# Supplementary material for: Intracellular Polyphenol Wine Metabolites Oppose Oxidative Stress and Upregulate Nrf2/ARE Pathway
Source: Antioxidants (Basel). 2022 Oct 19;11(10):2055. doi: 10.3390/antiox11102055 (PMC9598741; doi:10.3390/antiox11102055)
Supplement: Supplementary file 1 [file antioxidants-11-02055-s001.zip › Supplementary Figure S1.pdf]

Supplementary Figure S1.

[illegible]

**Figure S1. List of the metabolites that characterize the treated and control cells, based on p[1] loading values of Principal Component Analysis of Figure 1. Legend:** Based on the loadings (P[1]) of the Principal Component Analysis of Figure 1, arbitrary thresholds  $p[1] > 0.05$ , and  $p[1] < -0.05$  were chosen as characterizing respectively treated cells (T) and control cells (C). The relative quantification in all the samples and in the wine extract, analysed as reference, are reported in arbitrary units. The relative amount of each metabolites in all the cell samples are shown as heat map with blue=sample with lowest metabolite level; yellow= sample with average metabolite level; red=sample with highest metabolite level. The abundance of the metabolites in the wine sample are indicated with the same heat map. UI=unidentified. 5, 10, 20: millions of cells collected; 1,3,5:  $\mu\text{l}$  of cell extract analysed by UPLC-ESI-MS.
