# Supplementary material for: Intracellular Polyphenol Wine Metabolites Oppose Oxidative Stress and Upregulate Nrf2/ARE Pathway
Source: Antioxidants (Basel). 2022 Oct 19;11(10):2055. doi: 10.3390/antiox11102055 (PMC9598741; doi:10.3390/antiox11102055)
Supplement: Supplementary file 1 [file antioxidants-11-02055-s001.zip › Supplementary Figure S2.pdf]

## Supplementary Figure S2.

| id | Retention time (min) | m/z(-) detected | m/z(-) expected | elemental formula | Mass Error (ppm) | PUTATIVE IDENTIFICATION        | METABOLITE CLASS             |
|----|----------------------|-----------------|-----------------|-------------------|------------------|--------------------------------|------------------------------|
| 1  | 6,306233333          | 577,1326728     | 577,134         | C30H26O12         | -2,30            | procyanidin P2 type            | flavan-3-ols and derivatives |
| 2  | 8,327583333          | 435,1063198     | 435,107         | C24H20O8          | -1,56            | epicatechin 3-O-coumarate      | flavan-3-ols and derivatives |
| 3  | 6,264316667          | 435,1279637     | 435,129         | C21H24O10         | -2,38            | (epi)catechin-O-desoxyhexoside | flavan-3-ols and derivatives |
| 4  | 7,1609               | 517,1474844     | 517,134         | C25H26O12         | 26,08            | vitisin B                      | flavan-3-ols and derivatives |
| 5  | 4,940383333          | 577,1322405     | 577,134         | C30H26O12         | -3,05            | procyanidin P2 type            | flavan-3-ols and derivatives |
| 6  | 5,4411               | 865,1892923     | 865,197         | C45H38O18         | -8,91            | procyanidin P3 type            | flavan-3-ols and derivatives |
| 7  | 7,701133333          | 435,1068819     | 435,107         | C24H20O8          | -0,27            | catechin 3-O-coumarate         | flavan-3-ols and derivatives |
| 8  | 4,607383333          | 289,0698883     | 289,071         | C15H14O6          | -3,85            | catechin                       | flavan-3-ols and derivatives |
| 9  | 5,25245              | 289,0703573     | 289,071         | C15H14O6          | -2,22            | epicatechin                    | flavan-3-ols and derivatives |
| 10 | 5,25245              | 287,0537523     | 287,055         | C15H12O6          | -4,35            | dehydrokaempferol              | flavonoids                   |
| 11 | 6,52395              | 303,0513776     | 303,05          | C15H12O7          | 4,55             | taxifolin                      | flavonoids                   |
| 12 | 7,69065              | 433,1121388     | 433,113         | C21H22O10         | -1,99            | trihydroxy flavone O-hexoside  | flavonoids                   |
| 13 | 9,588616667          | 285,0383897     | 285,039         | C15H10O6          | -2,14            | kaempferol                     | flavonoids                   |
| 14 | 9,7644               | 315,0488254     | 315,05          | C16H12O7          | -3,73            | rhamnetin                      | flavonoids                   |
| 15 | 8,513866667          | 301,033906      | 301,034         | C15H10O7          | -0,31            | quercetin                      | flavonoids                   |
| 16 | 4,96135              | 179,0324983     | 179,034         | C9H8O4            | -8,39            | caffeic acid                   | hydroxycinnamic acids        |
| 17 | 5,899866667          | 163,0376463     | 163,039         | C9H8O3            | -8,30            | coumaric acid                  | hydroxycinnamic acids        |
| 18 | 4,471133333          | 299,0753041     | 299,076         | C13H16O8          | -2,33            | hydroxybenzoic acid hexoside   | hydroxybenzoic acids         |
| 19 | 7,96315              | 499,1374956     | 499,139         | C28H22O6          | -3,01            | e-viniferin (formic adduct)    | stilbenes and viniferins     |
| 20 | 8,390466667          | 499,1376972     | 499,139         | C28H22O6          | -2,61            | e-viniferin (formic adduct)    | stilbenes and viniferins     |
| 21 | 7,80595              | 227,069441      | 227,07          | C14H12O3          | -2,46            | resveratrol isomer             | stilbenes and viniferins     |
| 22 | 9,161283333          | 453,1326046     | 453,133         | C28H22O6          | -0,87            | e-viniferin                    | stilbenes and viniferins     |
| 23 | 9,337083333          | 499,1382343     | 499,139         | C28H22O6          | -1,53            | e-viniferin (formic adduct)    | stilbenes and viniferins     |
| 24 | 7,399566667          | 499,1373876     | 499,139         | C28H22O6          | -3,23            | e-viniferin (formic adduct)    | stilbenes and viniferins     |
| 25 | 8,859733333          | 227,0698517     | 227,07          | C14H12O3          | -0,65            | resveratrol                    | stilbenes and viniferins     |
| 26 | 8,828283333          | 905,2539639     | 905,259         | C56H42O12         | -5,56            | resveratrol tetramer           | stilbenes and viniferins     |

**Figure S2. Mass spectral features of wine extract metabolites accumulated in treated THP-1 cells and shown in Figure 2. Legend:** the retention time, detected m/z value (negative ionization mode), expected m/z value, elemental formula, mass error in ppm, putative identification and metabolite class are reported. Putative identification were supported by isotopic similarity and fragmentation.
